# Supplementary material for: CLPFFD–PEG functionalized NIR-absorbing hollow gold nanospheres and gold nanorods inhibit β-amyloid aggregation
Source: Royal Society of Chemistry journal article supplement (doi:10.1039/c8tb00655e), 2018-01-01
Supplement: c8tb00655e1.pdf [file c8tb00655e1.pdf]

## Supporting Information\*

### **CLPFFD-PEG Functionalized NIR-absorbing Hollow Gold Nanospheres and Gold Nanorods Inhibit $\beta$ -Amyloid Aggregation**

*Julie Ruff, Natalia Hassan, Francisco Morales-Zavala, Julia Steitz, Marcelo J. Kogan\* and Ulrich Simon\**

#### **Experimental section**

##### Thermal experiments

Thermography images were obtained from the interaction of Ab with and without gold nanoparticles. Gold nanoparticles and Ab were obtained as previously reported in the experimental part of the manuscript. The thermographs were obtained every 5 minutes of irradiation with an 808 nm, 450 mW continuous laser. The maximum temperature reached was 42°C. In order to compare the irradiation process with environmental temperature, a bath was heated to 42°C and the samples were incubated for 2 h. Immediately, the samples of both experiments were placed in a thermomixer for 48 h at 37°C and 300 rpm. To detect A $\beta$  the thioflavin-T assay was performed and the samples were placed in a black 382-well plate with 0.5 M glycine buffer a pH 8.4 and 0.1 M thioflavin-T as previously described in the experimental section of the manuscript.

\*Parts of the data shown here are also content of the supplementary data of Ref. [Ruff. Nanomedicine, 2107]

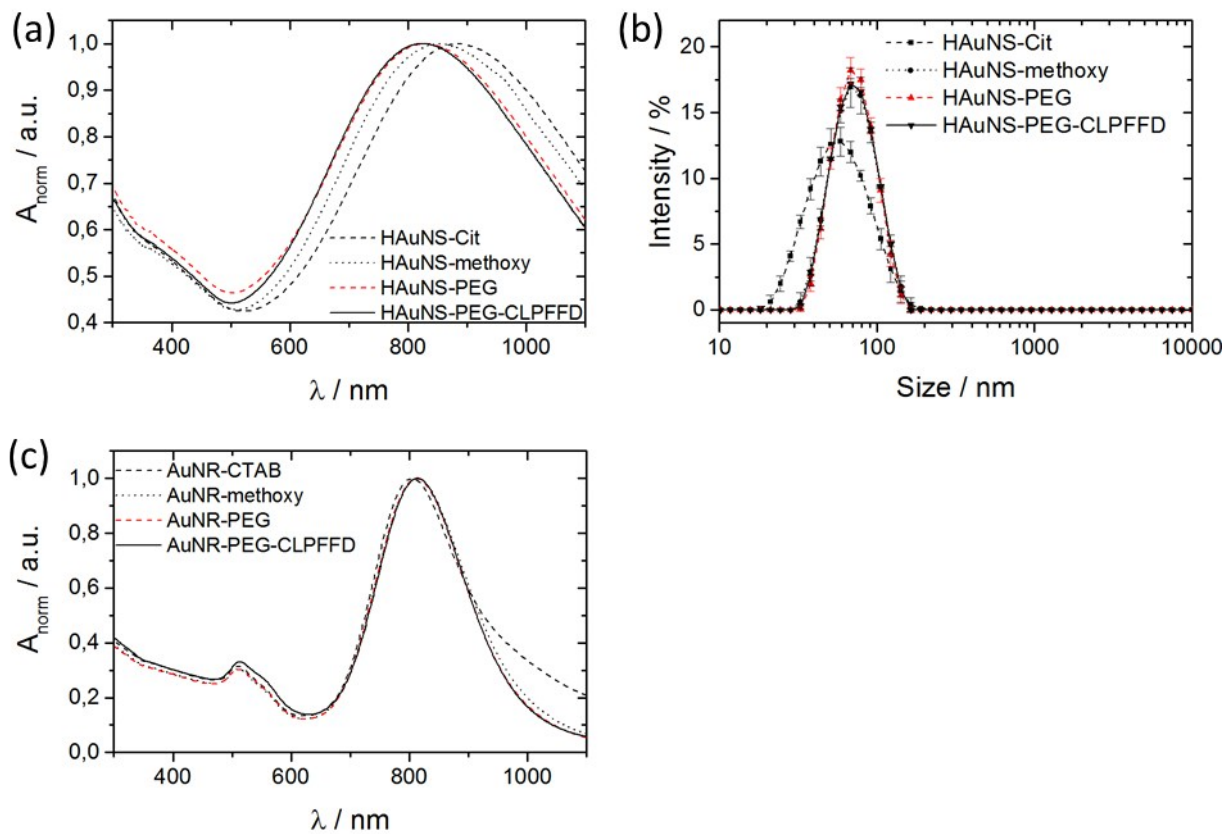

**Figure S1** – Indirect functionalization of HAuNS (Batch 1) and AuNR with CLPFFD peptides. (a) Absorbance spectra of HAuNS, (b) intensity weighted hydrodynamic diameter of HAuNS and (c) absorbance spectra of AuNR.

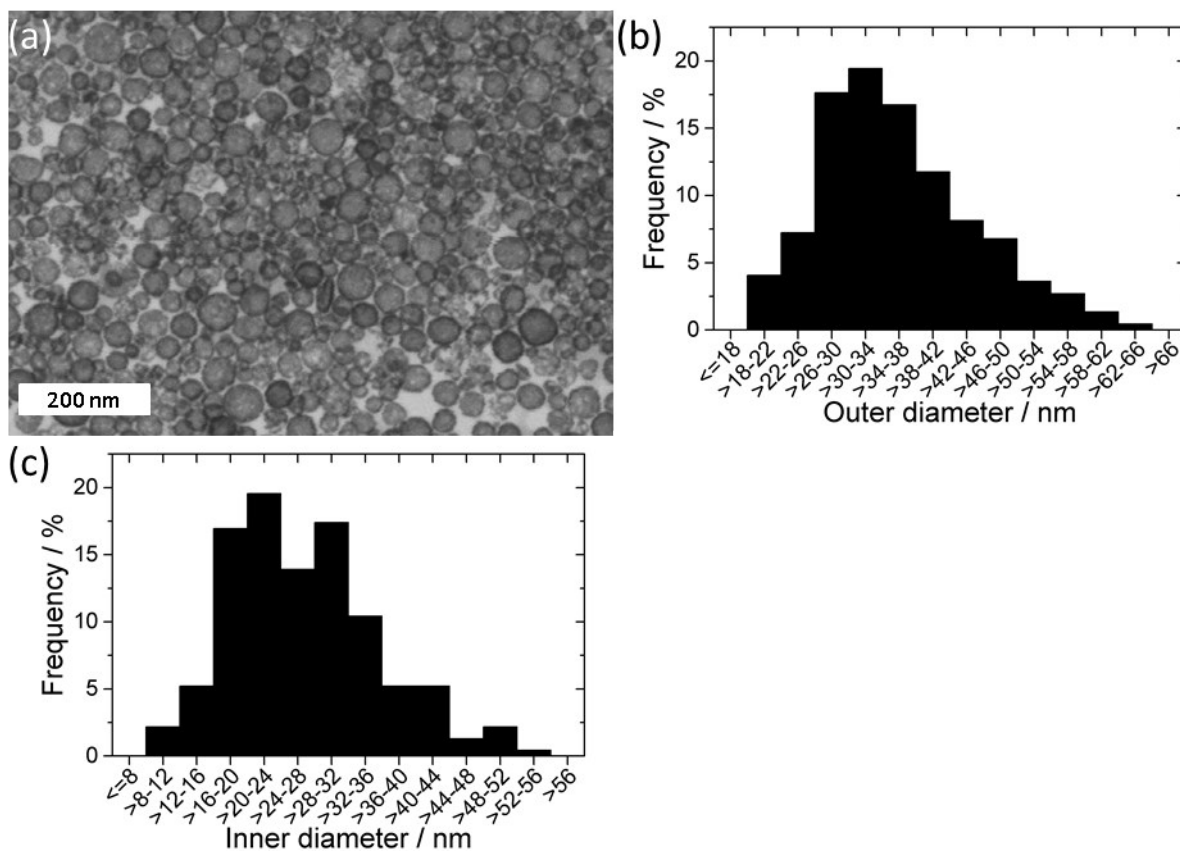

**Figure S2** – SEM-T Characterization of HAuNS-PEG-CLPFFD. (a) SEM-T image. Histogram of the (b) outer diameter with a  $d_o = 36 \pm 9$  nm and (c) inner diameter with a  $d_i = 27 \pm 8$  nm.

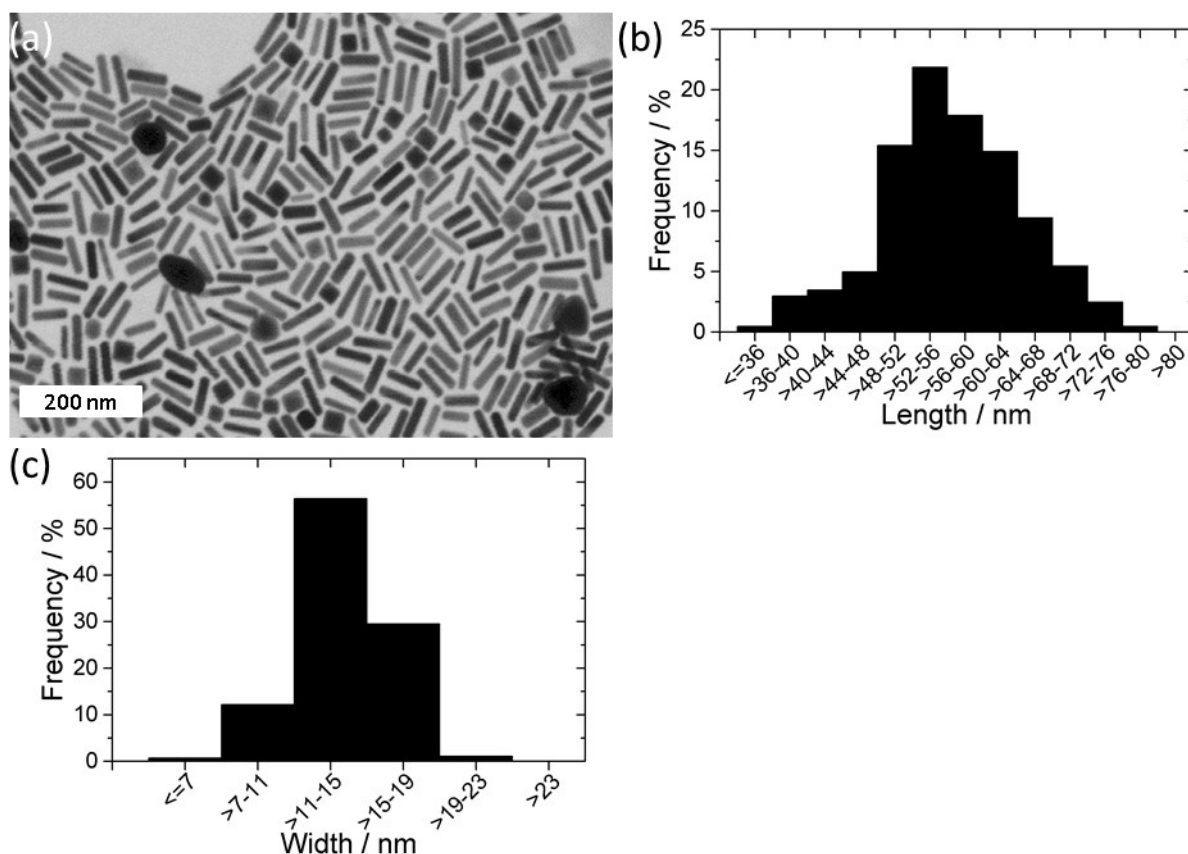

**Figure S3** - SEM-T Characterization of AuNR-PEG-CLPFFD. (a) SEM-T image. Histogram of the (b) length with a  $d_l = 60 \pm 9$  nm and (c) a width with a  $d_w = 14 \pm 3$  nm.

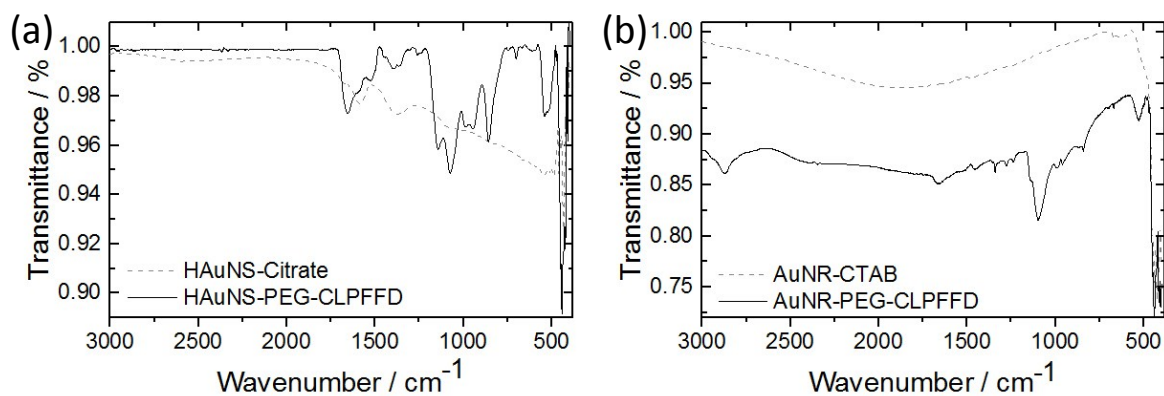

**Figure S4** – IR-spectra of (a) HAuNS-Citrate and HAuNS-PEG-CLPFFD and (b) AuNR-CTAB and AuNR-PEG-CLPFFD with in both cases the expected bands for the peptide at 2850-2960 (stretching vibration of the  $\text{CH}_2$  and  $\text{CH}_3$  group), 1632 (amide I band), 1560 (amide II band) and 1384 and 1269 (aromatic in plane bending vibration)  $\text{cm}^{-1}$ .

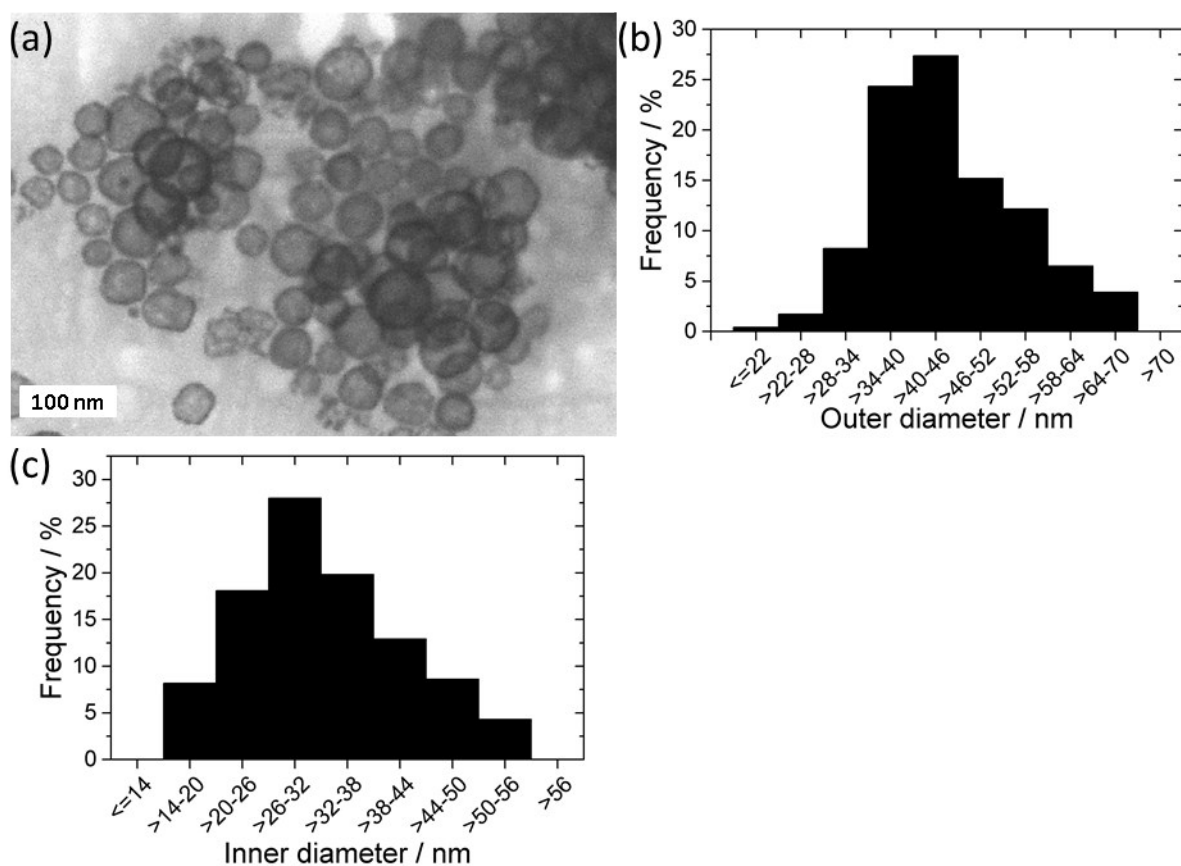

**Figure S5** – Direct functionalization of H AuNS with CLPFFD peptides: H AuNS-CLPFFD. (a) SEM-T image. Histogram of the (b) outer diameter with a  $d_o = 45 \pm 10$  nm and (c) inner diameter with a  $d_i = 32 \pm 9$  nm.

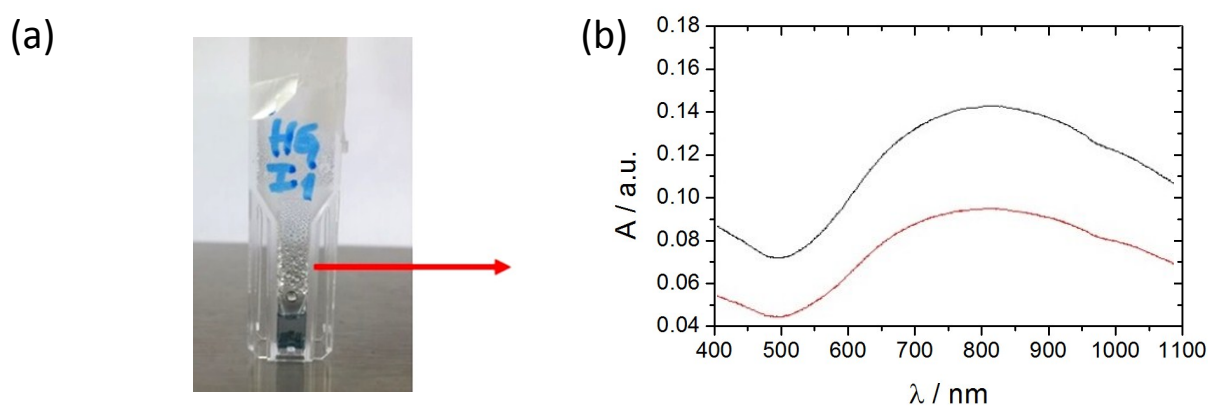

**Figure S6** – Effect of NIR-irradiation on H AuNS. (a) Sample of H AuNS-CLPFFD in PBS-Buffer irradiated with an 808 nm, 450 mW continuous laser for 2 h. (b) OES of H AuNS-CLPFFD irradiated (black line) and non-irradiated (red line). The effect of irradiation on the H AuNS was evaluated by the example of H AuNS-CLPFFD because it is known from literature that the irradiation of H AuNS with high laser intensities can lead to the conversion of NIR-absorbing H AuNS to shorter wavelengths-absorbing H AuNS or the breakdown of NIR-absorbing H AuNS into solid AuNS.<sup>[1,2]</sup> 2 h of NIR-irradiation with an 808 nm, 450 mW continuous laser increased considerably the temperature until evaporation of water as observable in Figure S6a. In the OE spectra (Figure S6b), only a slight decrease of the absorbance but no blue shift is noticeable which indicate the stability of the H AuNS in the used

set-up. Based on the extinction coefficient of the HAuNS, calculations have shown that still 70 % of the initially present HAuNS-CLPFFD concentration contributes to the observed OE spectra.

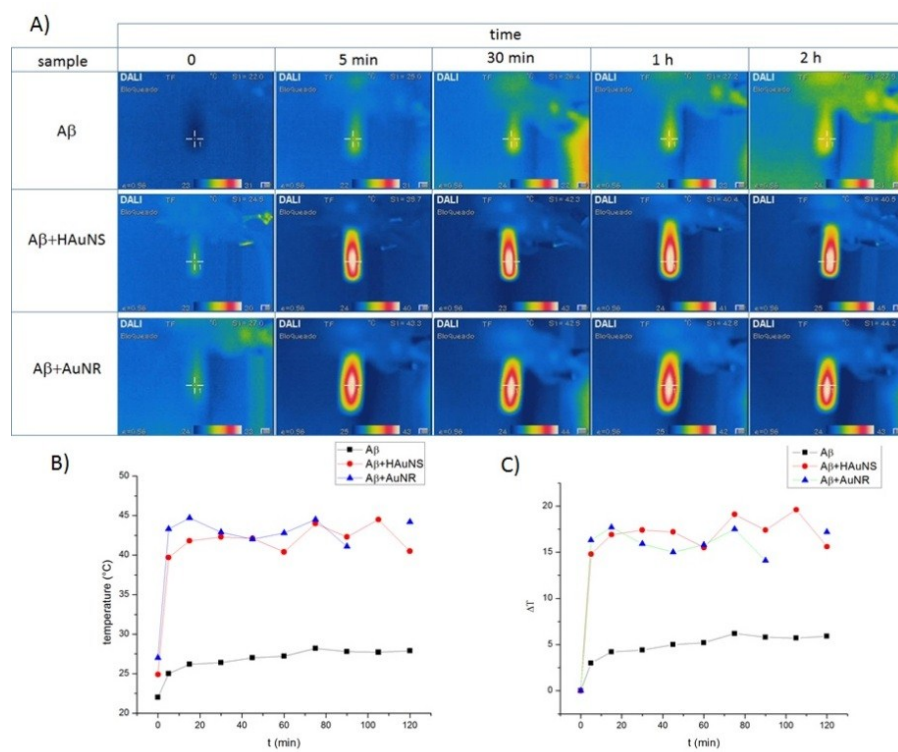

**Figure S7** – A) Thermal images of Aβ in absence and presence of AuNNR and HAuNS from 0 h to 2 h of irradiation (808 nm 450 mW continuous laser). B) Graphical representation of Figure S7A, increased temperature vs time. C) Graphical representation of S7A related to  $\Delta T$ .

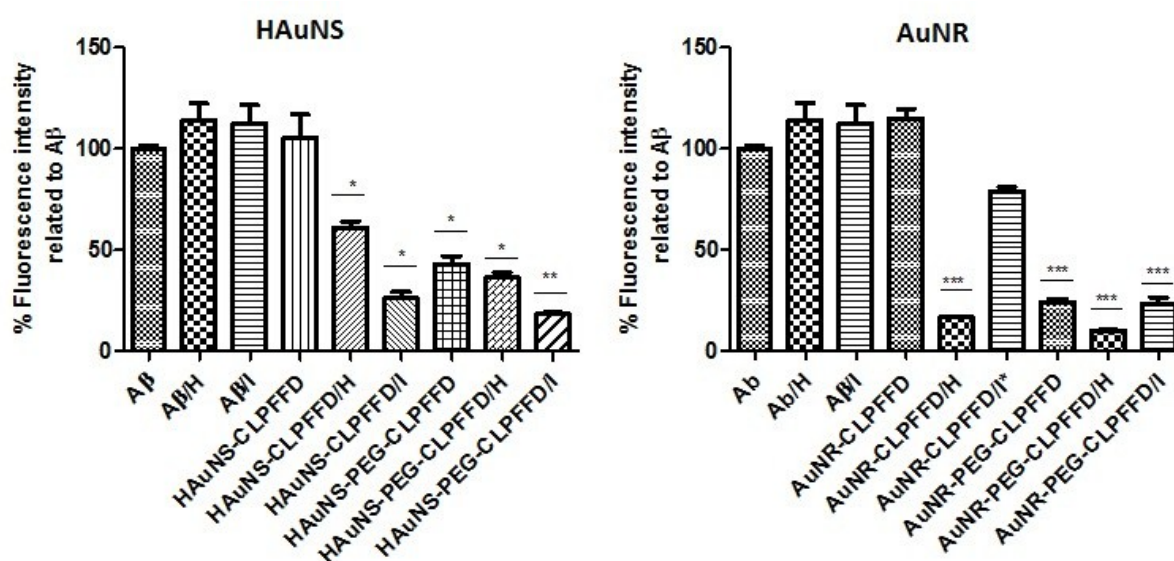

**Figure S8** – Comparison between irradiated (I) and heated in a bath (H) samples in presence and absence of HAuNS and AuNR. Differences are statistically significant related to Aβ control: \*\*\* $P \leq 0.001$

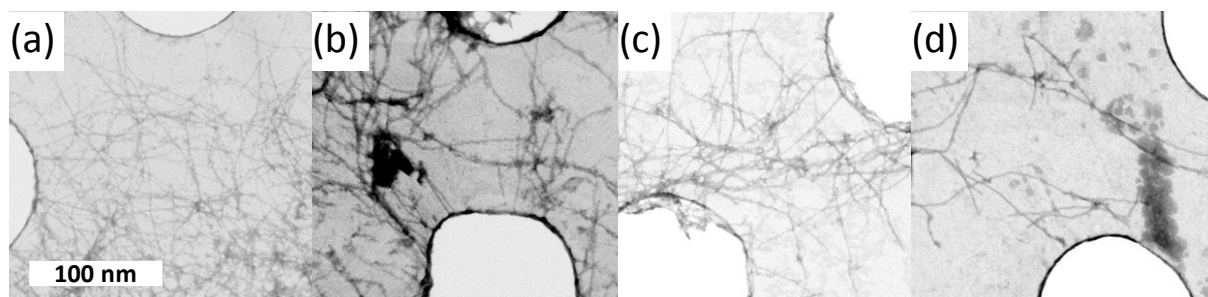

**Figure S9** – Inhibitory effect of unbound CLPFFD-peptide on  $A\beta$  fibril formation: TEM characterization. TEM images of  $A\beta$ -PIAA incubated in the presence of different concentrations of CLPFFD-peptide: (a) 0  $\mu\text{M}$ , (b) 1  $\mu\text{M}$ , (c) 50  $\mu\text{M}$  and (d) 100  $\mu\text{M}$ .

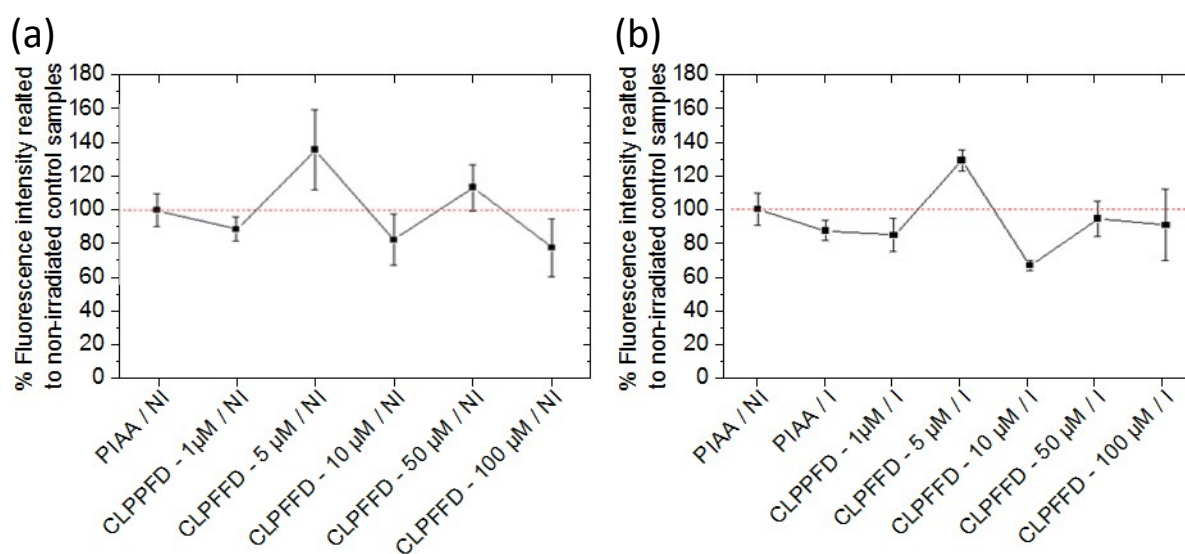

**Figure S10** – Inhibitory effect of unbound CLPFFD-peptide on  $A\beta$  fibril formation: thioflavin-T characterization. Results from the thioflavin-T assay of (a) non-irradiated samples and (b) irradiated samples. The lines are drawn to guide the eyes.

## References

- [1] B. G. Prevo, S. A. Esakoff, A. Mikhailovsky, J. A. Zasadzinski, *Small* **2008**, 4 (8), 1183–1195P.
- [2] D. A. Wheeler, R. J. Newhouse, H. Wang, S. Zou, J. Z. Zhang, *J. Phys. Chem. C* **2010**, 114 (42), 18126–18133]
